# Supplementary material for: Sexually transmitted infection laboratory testing and education trends in US outpatient physician offices, 2009–2016
Source: HighWire-hosted journal article supplement (doi:10.1136/fmch-2021-000914), 2021-06-01

**Table 1. Characteristics of Patient Visits Receiving Laboratory STI Testing or STI Prevention Education**

| Characteristic            | Total visits  | Visits with any STI test n (%) | Visits with Chlamydia test n (%) | Visits with Gonorrhea test n (%) | Visits with Hepatitis test n (%) | Visits with HIV test n (%) | Visits with HPV test n (%) | Visit with STI Education n (%) |
|---------------------------|---------------|--------------------------------|----------------------------------|----------------------------------|----------------------------------|----------------------------|----------------------------|--------------------------------|
| <b>Total</b>              | 7,644,094,505 | 123,178,600 (1.6%)             | 50,898,987 (0.7%)                | 16,550,691 (0.2%)                | 25,176,616 (0.3%)                | 41,301,070 (0.5%)          | 38,433,116 (0.5%)          | 17,991,847 (0.2%)              |
| <b>Sex</b>                |               |                                |                                  |                                  |                                  |                            |                            |                                |
| Female                    | 4,444,991,656 | 97,470,275 (79.1%)             | 42,317,720 (83.1%)               | 13,444,943 (81.2%)               | 16,615,604 (66.0%)               | 28,011,826 (67.8%)         | 34,805,277 (90.6%)         | 12,253,300 (68.1%)             |
| Male                      | 3,199,102,849 | 25,708,325 (20.9%)             | 8,581,267 (16.9%)                | 3,105,748 (18.8%)                | 8,561,012 (34.0%)                | 13,289,243 (32.2%)         | 3,627,839 (9.4%)           | 5,738,547 (31.9%)              |
| <b>Age group (years)</b>  |               |                                |                                  |                                  |                                  |                            |                            |                                |
| <15                       | 1,182,385,087 | 1,355,861 (1.1%)               | 332,594 (0.7%)                   | 129,097 (0.8%)                   | 363,277 (1.4%)                   | 301,707 (0.7%)             | 416,785 (1.1%)             | 2,019,986 (11.2%)              |
| 15-24                     | 571,308,913   | 26,303,301 (21.4%)             | 18,243,624 (35.8%)               | 5,784,797 (35.0%)                | 2,098,787 (8.3%)                 | 9,013,224 (21.8%)          | 4,293,697 (11.2%)          | 6,148,462 (34.2%)              |
| 25-44                     | 1,487,629,488 | 53,301,198 (43.3%)             | 24,647,552 (48.4%)               | 8,078,734 (48.8%)                | 8,219,220 (32.7%)                | 22,252,067 (53.9%)         | 16,791,987 (43.7%)         | 6,250,030 (34.7%)              |
| 45-64                     | 2,286,511,735 | 34,768,666 (28.2%)             | 6,702,036 (13.2%)                | 2,233,646 (13.5%)                | 11,031,344 (43.8%)               | 8,586,422 (20.8%)          | 15,019,014 (39.1%)         | 2,592,986 (14.4%)              |
| 65-74                     | 1,104,085,322 | 5,833,868 (4.7%)               | 699,122 (1.4%)                   | 310,173 (1.9%)                   | 2,659,482 (10.6%)                | 917,304 (2.2%)             | 1,619,061 (4.2%)           | 799,982 (4.5%)                 |
| 75+                       | 1,012,173,959 | 1,615,706 (1.3%)               | 274,060 (0.5%)                   | 14,244 (0.1%)                    | 804,505 (3.2%)                   | 230,324 (0.6%)             | 292,572 (0.8%)             | 180,400 (1.0%)                 |
| <b>Race/ethnicity</b>     |               |                                |                                  |                                  |                                  |                            |                            |                                |
| Non-Hispanic Black        | 792,641,849   | 29,593,047 (24.0%)             | 13,746,877 (27.0%)               | 4,513,411 (27.3%)                | 6,181,331 (24.6%)                | 10,877,669 (26.3%)         | 9,099,573 (23.7%)          | 2,820,957 (15.7%)              |
| Non-Hispanic White        | 5,455,264,348 | 58,405,123 (47.4%)             | 23,108,950 (45.4%)               | 6,522,258 (39.4%)                | 11,668,452 (46.4%)               | 18,280,308 (44.3%)         | 19,007,966 (49.5%)         | 8,553,948 (47.5%)              |
| Hispanic                  | 992,322,043   | 24,768,951 (20.1%)             | 11,404,708 (22.4%)               | 4,745,890 (28.7%)                | 3,596,604 (14.3%)                | 9,102,582 (22.0%)          | 6,075,319 (15.8%)          | 5,029,804 (28.0%)              |
| Non-Hispanic other        | 403,866,265   | 10,411,479 (8.5%)              | 2,638,453 (5.9%)                 | 769,132 (4.7%)                   | 3,730,230 (14.8%)                | 3,040,510 (7.4%)           | 4,250,258 (11.1%)          | 1,587,139 (8.8%)               |
| <b>Geographic region</b>  |               |                                |                                  |                                  |                                  |                            |                            |                                |
| Midwest                   | 1,499,588,891 | 18,088,149 (14.7%)             | 7,269,038 (14.3%)                | 2,010,961 (12.2%)                | 3,837,233 (15.2%)                | 4,718,305 (11.4%)          | 6,289,858 (16.4%)          | 2,689,378 (15.0%)              |
| Northeast                 | 1,512,245,597 | 24,736,184 (20.1%)             | 12,748,471 (25.1%)               | 2,899,165 (17.5%)                | 5,284,427 (21.0%)                | 7,307,681 (17.7%)          | 4,483,081 (11.7%)          | 5,208,881 (29.0%)              |
| South                     | 2,871,140,726 | 56,434,655 (45.8%)             | 20,824,223 (40.9%)               | 7,553,173 (45.6%)                | 12,307,383 (48.9%)               | 20,741,255 (50.2%)         | 19,542,267 (50.9%)         | 5,689,554 (31.6%)              |
| West                      | 1,761,119,291 | 23,919,611 (19.4%)             | 10,057,254 (19.8%)               | 4,087,391 (24.7%)                | 3,747,573 (14.9%)                | 8,533,828 (20.7%)          | 8,117,910 (21.1%)          | 4,404,034 (24.5%)              |
| <b>Insurance type</b>     |               |                                |                                  |                                  |                                  |                            |                            |                                |
| Medicaid                  | 367,336,854   | 6,526,792 (5.3%)               | 4,171,483 (8.2%)                 | ---                              | ---                              | 2,171,070 (5.3%)           | 1,493,821 (3.9%)           | ---                            |
| Medicare                  | 1,955,256,724 | 8,452,750 (6.9%)               | 1,925,499 (3.8%)                 | 427,094 (2.6%)                   | 3,361,369 (13.4%)                | 1,429,539 (3.5%)           | 2,149,478 (5.6%)           | 957,767 (5.3%)                 |
| Private                   | 3,876,174,553 | 73,945,503 (60.0%)             | 29,032,385 (57.0%)               | 8,686,395 (52.5%)                | 15,856,658 (63.0%)               | 24,355,534 (59.0%)         | 25,444,028 (66.2%)         | 10,312,124 (57.3%)             |
| Self-pay                  | 320,269,887   | 3,787,115 (3.1%)               | 1,689,214 (3.3%)                 | 341,760 (2.1%)                   | 436,169 (1.7%)                   | 1,201,712 (2.9%)           | 1,121,406 (2.9%)           | 510,361 (2.8%)                 |
| Other <sup>a</sup>        | 1,125,056,487 | 30,466,441 (24.7%)             | 14,080,407 (27.7%)               | 7,095,442 (42.9%)                | 5,522,419 (21.9%)                | 12,143,215 (29.4%)         | 8,224,383 (21.4%)          | 6,211,596 (34.5%)              |
| <b>Provider Specialty</b> |               |                                |                                  |                                  |                                  |                            |                            |                                |
| Family Practice           | 1,641,108,941 | 34,181,888 (27.8%)             | 9,688,553 (19.0%)                | 2,279,208 (13.8%)                | 8,997,851 (35.7%)                | 13,301,495 (32.2%)         | 12,884,514 (33.5%)         | 4,427,222 (24.6%)              |
| Internal Medicine         | 1,044,547,960 | 13,713,318 (11.1%)             | 4,159,751 (8.2%)                 | 1,764,621 (10.7%)                | 6,012,995 (23.9%)                | 5,445,960 (13.2%)          | 1,311,878 (3.4%)           | 1,457,262 (8.1%)               |
| OB/GYN                    | 564,174,281   | 58,535,106 (47.5%)             | 30,932,072 (60.8%)               | 10,614,936 (64.1%)               | 4,894,176 (19.4%)                | 16,225,261 (39.3%)         | 22,520,567 (58.6%)         | 5,718,786 (31.8%)              |
| Pediatrics                | 976,652,792   | 4,567,745 (3.7%)               | 2,066,681 (4.1%)                 | 882,991 (5.3%)                   | 886,284 (3.5%)                   | 1,570,495 (3.8%)           | 1,045,540 (2.7%)           | 4,958,189 (27.6%)              |
| Other <sup>b</sup>        | 3,417,610,531 | 12,162,543 (9.9%)              | 4,051,929 (8.0%)                 | 1,008,934 (6.1%)                 | 4,385,310 (17.4%)                | 4,757,859 (11.5%)          | 670,617 (1.7%)             | 1,430,389 (8.0%)               |

<sup>a</sup>“Other” insurance type is a combination of the following: Medicaid + CHIP, Medicaid/CHIP/other state-based program, no charge, charity, other, unknown, and Worker’s compensation

<sup>b</sup>“Other” specialty is a combination of the following: Cardiology, Dermatology, General surgery, Neurology, Oncology, Ophthalmology, Orthopedic surgery, Otolaryngology, Allergy, Pulmonology, Psychiatry, Urology, and ‘Other’ specialties as coded by NAMCS  
OB/GYN: Obstetrics and Gynecology

Figure 5. STI Testing Rates by Insurance Type

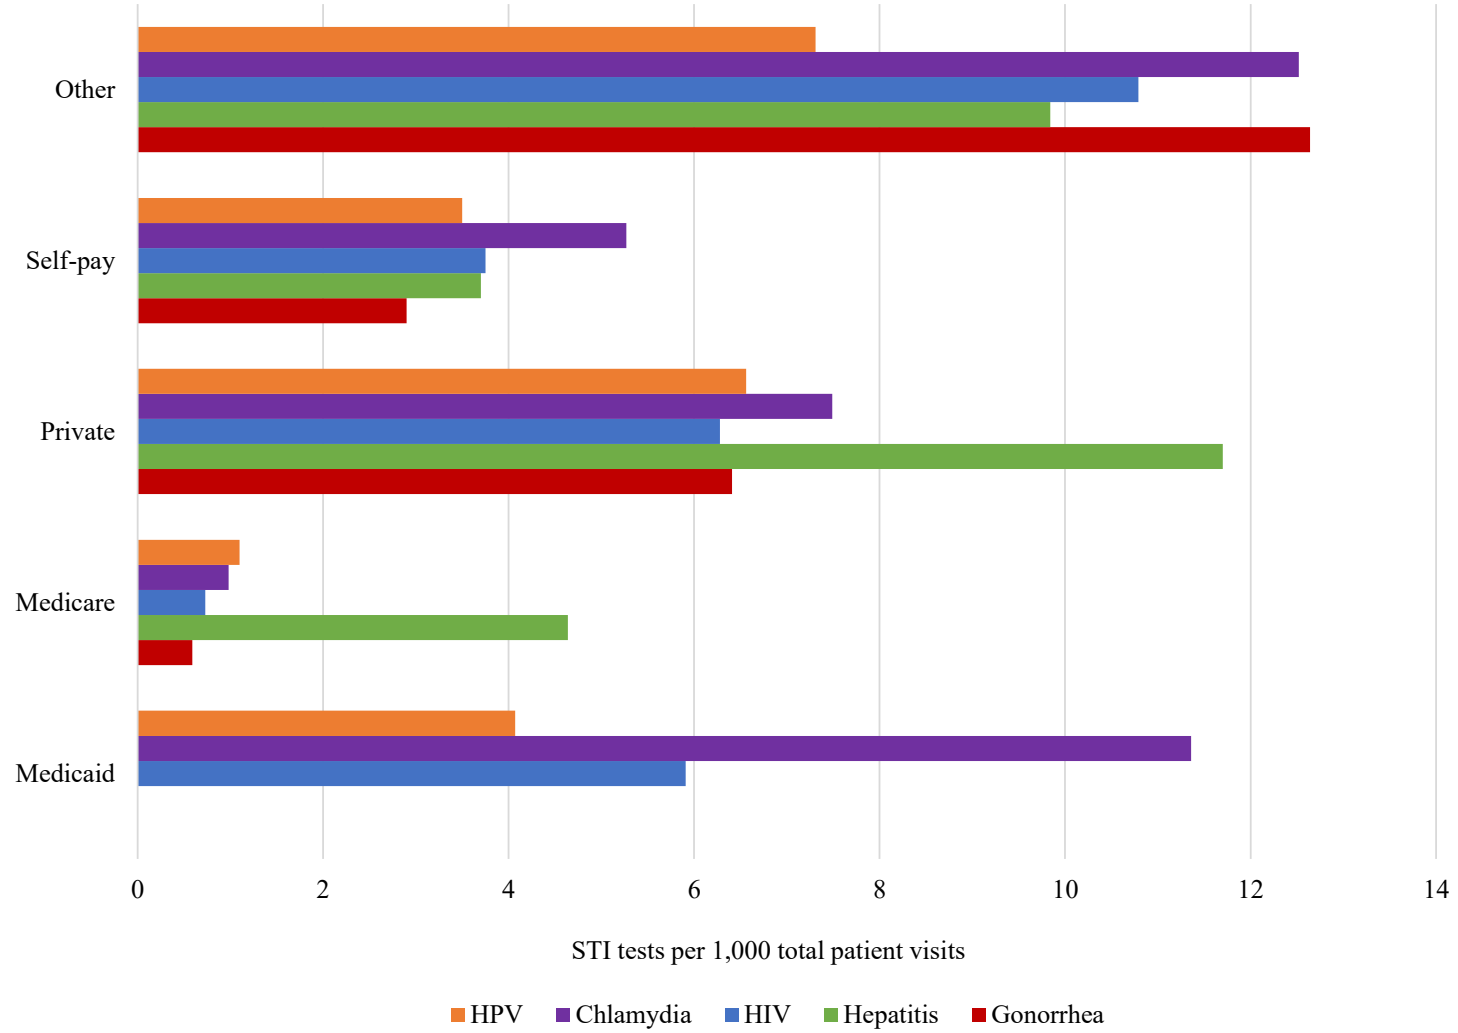

**Figure 6. STI Testing Rates by Provider Specialty**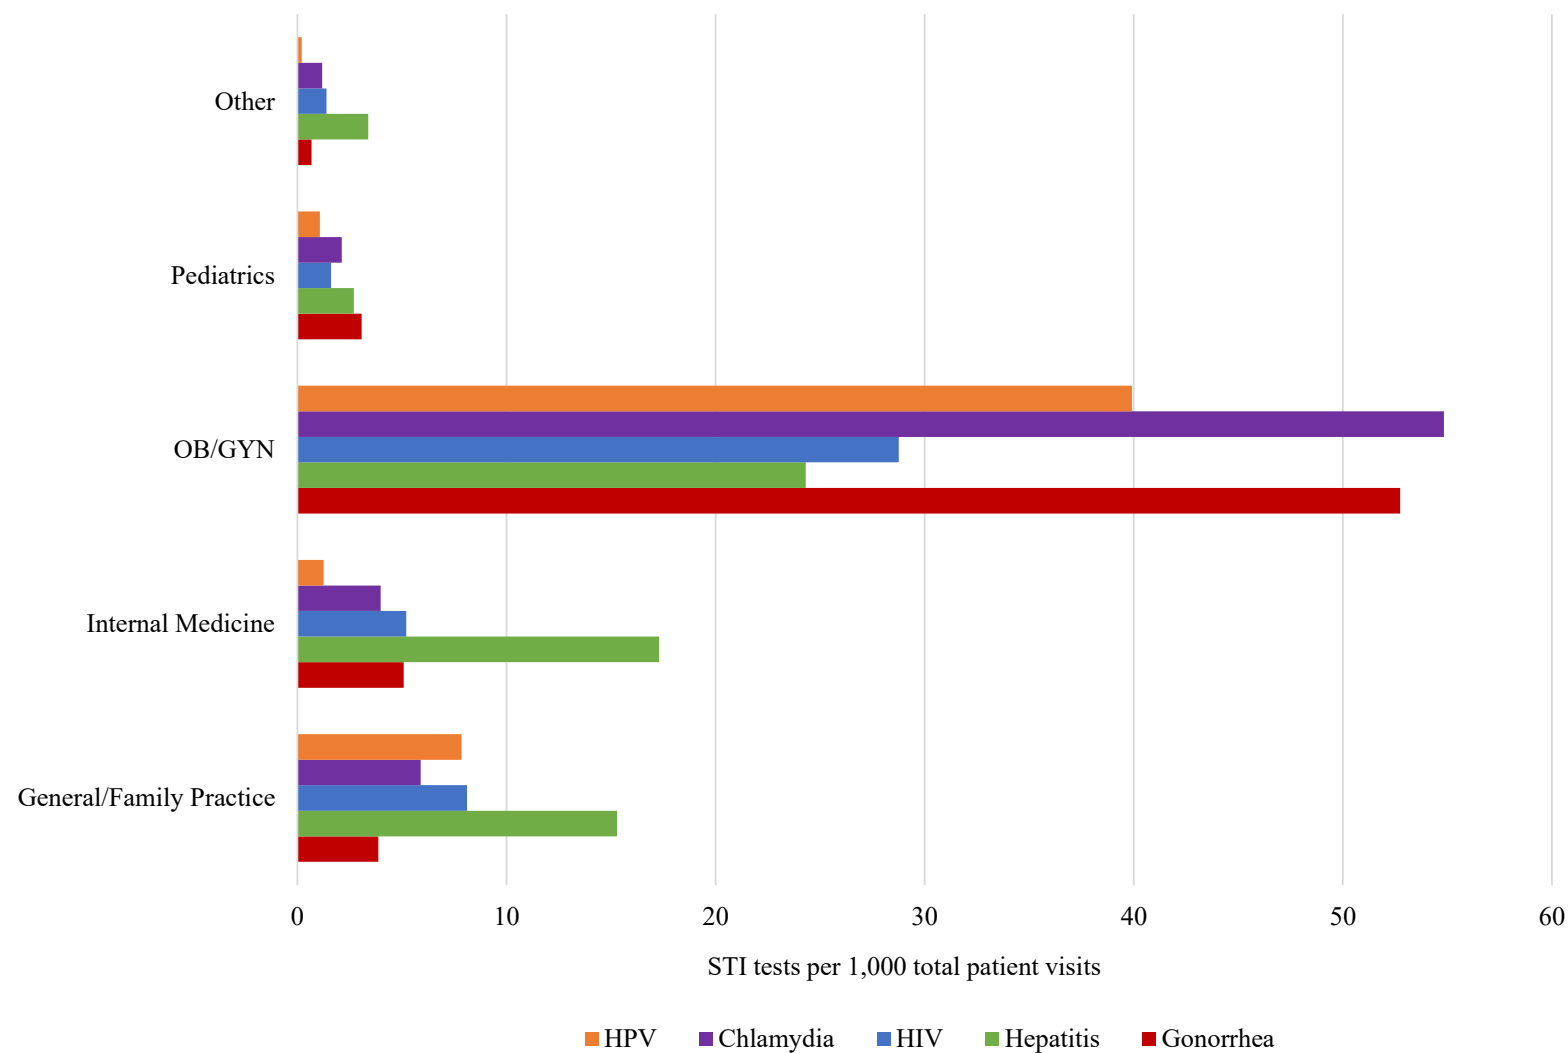

Supplement: fmch-2021-000914supp001_data_supplement.pdf [file fmch-2021-000914supp001_data_supplement.pdf]
